# Supplementary material
Source: PubMed Central journal article supplement (PMC10156584)
Supplement: mmc1.pdf [file mmc1.pdf]

**Cell Reports, Volume 42**

**Supplemental information**

**The diversity of the glycan shield  
of sarbecoviruses related to SARS-CoV-2**

**Joel D. Allen, Dylan P. Ivory, Sophie Ge Song, Wan-ting He, Tazio Capozzola, Peter Yong, Dennis R. Burton, Raiees Andrabi, and Max Crispin**

**Supplemental Table 1: Conservation of SARS-CoV-2 PNGS across 78 sarbecovirus sequences (related to Figure 1)**

| Position on alignment | SARS-CoV-2 glycan position | % of sites |
|-----------------------|----------------------------|------------|
| 25                    | 17                         | 19%        |
| 69                    | 61                         | 91%        |
| 82                    | 74                         | 3%         |
| 130                   | 122                        | 97%        |
| 157                   | 146                        | 18%        |
| 173                   | 165                        | 100%       |
| 247                   | 234                        | 97%        |
| 295                   | 282                        | 97%        |
| 344                   | 331                        | 97%        |
| 356                   | 343                        | 97%        |
| 401                   | 370                        | 91%        |
| 635                   | 603                        | 94%        |
| 648                   | 616                        | 99%        |
| 692                   | 657                        | 85%        |
| 745                   | 709                        | 99%        |
| 753                   | 717                        | 97%        |
| 837                   | 801                        | 99%        |
| 1110                  | 1074                       | 100%       |
| 1134                  | 1098                       | 100%       |
| 1170                  | 1134                       | 100%       |
| 1194                  | 1158                       | 100%       |
| 1209                  | 1173                       | 100%       |
| 1230                  | 1194                       | 100%       |

**Supplemental Table 2: Coronavirus sequence similarity displayed as a percentage identity matrix (related to Figure 1)**

|          | NL63 | 229E | OC43 | HKU1 | MERS | BM4831 | BtKY72 | Pang17 | RaTG13 | SARS-CoV-2 | RmYN02 | SARS-CoV-1 | RsSHC014 | WIV1 | Rf1 | Yun11 | RS4081 |
|----------|------|------|------|------|------|--------|--------|--------|--------|------------|--------|------------|----------|------|-----|-------|--------|
| NL63     | 100  | 66   | 31   | 31   | 29   | 31     | 31     | 29     | 30     | 30         | 30     | 30         | 30       | 30   | 31  | 30    | 31     |
| 229E     | 66   | 100  | 32   | 33   | 32   | 31     | 32     | 31     | 32     | 32         | 32     | 32         | 32       | 32   | 32  | 32    | 32     |
| OC43     | 31   | 32   | 100  | 67   | 37   | 36     | 35     | 35     | 35     | 35         | 36     | 35         | 36       | 36   | 37  | 36    | 36     |
| HKU1     | 31   | 33   | 67   | 100  | 36   | 35     | 34     | 34     | 35     | 35         | 36     | 35         | 35       | 36   | 36  | 34    | 35     |
| MERS     | 29   | 32   | 37   | 36   | 100  | 35     | 35     | 34     | 35     | 35         | 35     | 35         | 35       | 35   | 35  | 35    | 35     |
| BM4831   | 31   | 31   | 36   | 35   | 35   | 100    | 84     | 73     | 73     | 73         | 72     | 76         | 76       | 76   | 75  | 76    | 76     |
| BtKY72   | 31   | 32   | 35   | 34   | 35   | 84     | 100    | 74     | 74     | 74         | 73     | 77         | 77       | 77   | 77  | 78    | 77     |
| Pang17   | 29   | 31   | 35   | 34   | 34   | 73     | 74     | 100    | 93     | 93         | 76     | 78         | 78       | 78   | 77  | 77    | 77     |
| RaTG13   | 30   | 32   | 35   | 35   | 35   | 73     | 74     | 93     | 100    | 98         | 76     | 78         | 78       | 78   | 77  | 77    | 77     |
| SARS2    | 30   | 32   | 35   | 35   | 35   | 73     | 74     | 93     | 98     | 100        | 76     | 77         | 78       | 78   | 77  | 77    | 77     |
| RmYN02   | 30   | 32   | 36   | 36   | 35   | 72     | 73     | 76     | 76     | 76         | 100    | 74         | 74       | 74   | 79  | 79    | 79     |
| SARS1    | 30   | 32   | 35   | 35   | 35   | 76     | 77     | 78     | 78     | 77         | 74     | 100        | 90       | 92   | 79  | 81    | 81     |
| RsSHC014 | 30   | 32   | 36   | 35   | 35   | 76     | 77     | 78     | 78     | 78         | 74     | 90         | 100      | 97   | 80  | 81    | 81     |
| WIV1     | 30   | 32   | 36   | 36   | 35   | 76     | 77     | 78     | 78     | 78         | 74     | 92         | 97       | 100  | 80  | 81    | 81     |
| Rf1      | 31   | 32   | 37   | 36   | 35   | 75     | 77     | 77     | 77     | 77         | 79     | 79         | 80       | 80   | 100 | 90    | 89     |
| Yun11    | 30   | 32   | 36   | 34   | 35   | 76     | 78     | 77     | 77     | 77         | 79     | 81         | 81       | 81   | 90  | 100   | 92     |
| RS4081   | 31   | 32   | 36   | 35   | 35   | 76     | 77     | 77     | 77     | 77         | 79     | 81         | 81       | 81   | 89  | 92    | 100    |

**Supplemental Table 3: Abundance of SARS-CoV-2 PNGS in the 78- and 12- virus panels (Related to Figure 1)**

| 78-virus panel   |            | 12-virus panel   |                 |      |
|------------------|------------|------------------|-----------------|------|
|                  | % of sites |                  | Number of sites |      |
| N165             | 100%       | N122             | 12              | 100% |
| N1074            | 100%       | N165             | 12              | 100% |
| N1098            | 100%       | N234             | 12              | 100% |
| N1134            | 100%       | N282             | 12              | 100% |
| N1158            | 100%       | N331             | 12              | 100% |
| N1173            | 100%       | N343             | 12              | 100% |
| N1194            | 100%       | N616             | 12              | 100% |
| N616             | 99%        | N717             | 12              | 100% |
| N709             | 99%        | N801             | 12              | 100% |
| N801             | 99%        | N1074            | 12              | 100% |
| N122             | 97%        | N1098            | 12              | 100% |
| N234             | 97%        | N1134            | 12              | 100% |
| N282             | 97%        | N1158            | 12              | 100% |
| N331             | 97%        | N1173            | 12              | 100% |
| N343             | 97%        | N1194            | 12              | 100% |
| N717             | 97%        | N61              | 11              | 92%  |
| N603             | 94%        | N370             | 11              | 92%  |
| N61              | 91%        | N603             | 11              | 92%  |
| N370             | 91%        | N709             | 10              | 83%  |
| N657             | 85%        | N657             | 9               | 75%  |
| N17              | 19%        | N149             | 6               | 50%  |
| N149             | 18%        | N17              | 3               | 25%  |
| N74              | 3%         | N74              | 1               | 8%   |
| <hr/>            |            | <hr/>            |                 |      |
| sites under 90 % |            | sites under 90 % |                 |      |
| N657             | 85%        | N709             | 10              | 83%  |
| N17              | 19%        | N657             | 9               | 75%  |
| N149             | 18%        | N149             | 6               | 50%  |
| N74              | 3%         | N17              | 3               | 25%  |
| <hr/>            |            | <hr/>            |                 |      |
|                  |            | N74              | 1               | 8%   |
| <hr/>            |            | <hr/>            |                 |      |





**Supplemental Table 5: Site-specific glycan analysis of clade 1b sarbecoviruses (related to Figure 2 and 3)**

| Pang17           | N17 | N20 | N28 | N30 | N59 | N61 | N69 | N74 | N112 | N122 | N149 | N162 | N165 | N176 | N185 | N234 | N282 | N307 | N331 | N343 | N370 | N554 | N603 | N616 | N657 | N677 | N709 | N717 | N801 | N1074 | N1098 | N1134 | N1158 | N1173 | N1194 |   |   |
|------------------|-----|-----|-----|-----|-----|-----|-----|-----|------|------|------|------|------|------|------|------|------|------|------|------|------|------|------|------|------|------|------|------|------|-------|-------|-------|-------|-------|-------|---|---|
| MBGlc            | 0   | 0   | 0   | 0   | 0   | 0   | 0   | 0   | 0    | 0    | 0    | 0    | 0    | 0    | 0    | 0    | 0    | 0    | 0    | 0    | 0    | 0    | 0    | 0    | 0    | 0    | 0    | 0    | 0    | 0     | 0     | 0     | 0     | 0     | 0     | 0 |   |
| M9               | 100 | 0   | 0   | 0   | 0   | 0   | 0   | 0   | 0    | 0    | 0    | 0    | 0    | 0    | 60   | 0    | 0    | 0    | 0    | 0    | 1    | 0    | 0    | 0    | 0    | 0    | 0    | 0    | 0    | 0     | 0     | 0     | 0     | 0     | 0     | 0 |   |
| M8               | 0   | 1   | 0   | 1   | 0   | 0   | 0   | 0   | 0    | 0    | 0    | 0    | 0    | 0    | 28   | 0    | 0    | 0    | 0    | 0    | 4    | 0    | 0    | 0    | 0    | 0    | 0    | 0    | 0    | 0     | 0     | 0     | 0     | 0     | 0     | 0 |   |
| M7               | 0   | 0   | 16  | 1   | 0   | 0   | 0   | 0   | 4    | 0    | 0    | 0    | 0    | 0    | 6    | 0    | 0    | 0    | 0    | 14   | 0    | 0    | 0    | 0    | 0    | 0    | 8    | 6    | 0    | 1     | 0     | 0     | 0     | 0     | 0     | 0 |   |
| M6               | 0   | 0   | 52  | 5   | 0   | 0   | 0   | 0   | 4    | 0    | 0    | 0    | 0    | 0    | 3    | 0    | 0    | 0    | 1    | 31   | 0    | 0    | 0    | 0    | 0    | 0    | 7    | 3    | 0    | 0     | 0     | 0     | 0     | 0     | 0     | 0 |   |
| M5               | 0   | 0   | 26  | 62  | 0   | 0   | 0   | 0   | 55   | 4    | 0    | 0    | 0    | 0    | 2    | 15   | 0    | 0    | 0    | 0    | 0    | 0    | 0    | 0    | 0    | 0    | 100  | 79   | 66   | 57    | 5     | 7     | 0     | 0     | 0     | 0 |   |
| M4               | 0   | 0   | 3   | 9   | 0   | 0   | 0   | 0   | 1    | 0    | 0    | 0    | 0    | 0    | 0    | 0    | 0    | 0    | 0    | 1    | 0    | 0    | 0    | 0    | 0    | 0    | 0    | 0    | 0    | 0     | 0     | 0     | 0     | 0     | 0     | 0 | 0 |
| M3               | 0   | 0   | 0   | 0   | 0   | 0   | 0   | 0   | 0    | 0    | 0    | 0    | 0    | 0    | 0    | 0    | 0    | 0    | 0    | 0    | 0    | 0    | 0    | 0    | 0    | 0    | 0    | 0    | 0    | 0     | 0     | 0     | 0     | 0     | 0     | 0 | 0 |
| FM               | 0   | 0   | 0   | 0   | 0   | 0   | 0   | 0   | 0    | 0    | 0    | 0    | 0    | 0    | 0    | 0    | 0    | 0    | 0    | 0    | 0    | 0    | 0    | 0    | 0    | 0    | 0    | 0    | 0    | 0     | 0     | 0     | 0     | 0     | 0     | 0 | 0 |
| Hybrid           | 0   | 0   | 0   | 0   | 0   | 0   | 0   | 0   | 0    | 0    | 0    | 0    | 0    | 0    | 0    | 0    | 0    | 0    | 0    | 0    | 0    | 0    | 0    | 0    | 0    | 0    | 0    | 0    | 0    | 0     | 0     | 0     | 0     | 0     | 0     | 0 | 0 |
| Fhybrid          | 0   | 0   | 0   | 0   | 0   | 0   | 0   | 0   | 0    | 0    | 0    | 0    | 0    | 0    | 0    | 0    | 0    | 0    | 0    | 0    | 0    | 0    | 0    | 0    | 0    | 0    | 0    | 0    | 0    | 0     | 0     | 0     | 0     | 0     | 0     | 0 | 0 |
| HexNAc(3)(x)     | 0   | 0   | 0   | 0   | 0   | 0   | 0   | 0   | 0    | 0    | 0    | 0    | 0    | 0    | 0    | 0    | 0    | 0    | 0    | 0    | 0    | 0    | 0    | 0    | 0    | 0    | 0    | 0    | 0    | 0     | 0     | 0     | 0     | 0     | 0     | 0 | 0 |
| HexNAc(3)(F)(x)  | 0   | 0   | 0   | 0   | 0   | 0   | 0   | 0   | 0    | 0    | 0    | 0    | 0    | 0    | 0    | 0    | 0    | 0    | 0    | 0    | 0    | 0    | 0    | 0    | 0    | 0    | 0    | 0    | 0    | 0     | 0     | 0     | 0     | 0     | 0     | 0 | 0 |
| HexNAc(4)(x)     | 0   | 0   | 0   | 0   | 0   | 0   | 0   | 0   | 0    | 0    | 0    | 0    | 0    | 0    | 0    | 0    | 0    | 0    | 0    | 0    | 0    | 0    | 0    | 0    | 0    | 0    | 0    | 0    | 0    | 0     | 0     | 0     | 0     | 0     | 0     | 0 | 0 |
| HexNAc(4)(F)(x)  | 0   | 0   | 0   | 0   | 0   | 0   | 0   | 0   | 0    | 0    | 0    | 0    | 0    | 0    | 0    | 0    | 0    | 0    | 0    | 0    | 0    | 0    | 0    | 0    | 0    | 0    | 0    | 0    | 0    | 0     | 0     | 0     | 0     | 0     | 0     | 0 | 0 |
| HexNAc(5)(x)     | 0   | 0   | 0   | 0   | 0   | 0   | 0   | 0   | 0    | 0    | 0    | 0    | 0    | 0    | 0    | 0    | 0    | 0    | 0    | 0    | 0    | 0    | 0    | 0    | 0    | 0    | 0    | 0    | 0    | 0     | 0     | 0     | 0     | 0     | 0     | 0 | 0 |
| HexNAc(5)(F)(x)  | 0   | 0   | 0   | 0   | 0   | 0   | 0   | 0   | 0    | 0    | 0    | 0    | 0    | 0    | 0    | 0    | 0    | 0    | 0    | 0    | 0    | 0    | 0    | 0    | 0    | 0    | 0    | 0    | 0    | 0     | 0     | 0     | 0     | 0     | 0     | 0 | 0 |
| HexNAc(6+)(x)    | 0   | 0   | 0   | 0   | 0   | 0   | 0   | 0   | 0    | 0    | 0    | 0    | 0    | 0    | 0    | 0    | 0    | 0    | 0    | 0    | 0    | 0    | 0    | 0    | 0    | 0    | 0    | 0    | 0    | 0     | 0     | 0     | 0     | 0     | 0     | 0 | 0 |
| HexNAc(6+)(F)(x) | 0   | 0   | 0   | 0   | 0   | 0   | 0   | 0   | 0    | 0    | 0    | 0    | 0    | 0    | 0    | 0    | 0    | 0    | 0    | 0    | 0    | 0    | 0    | 0    | 0    | 0    | 0    | 0    | 0    | 0     | 0     | 0     | 0     | 0     | 0     | 0 | 0 |
| Unoccupied       | 0   | 1   | 1   | 0   | 0   | 0   | 0   | 0   | 0    | 1    | 0    | 0    | 0    | 0    | 0    | 0    | 0    | 0    | 0    | 0    | 0    | 0    | 0    | 0    | 0    | 0    | 0    | 0    | 0    | 0     | 0     | 0     | 0     | 0     | 0     | 0 | 0 |
| Core             | 0   | 0   | 1   | 3   | 0   | 0   | 0   | 0   | 0    | 0    | 0    | 0    | 0    | 0    | 0    | 0    | 0    | 0    | 0    | 0    | 0    | 0    | 0    | 0    | 0    | 0    | 0    | 0    | 0    | 0     | 0     | 0     | 0     | 0     | 0     | 0 | 0 |

  

|              |     |   |    |    |   |   |   |   |    |    |   |   |   |    |   |    |    |   |   |   |   |   |   |   |   |   |   |   |   |   |   |   |   |   |   |   |   |   |
|--------------|-----|---|----|----|---|---|---|---|----|----|---|---|---|----|---|----|----|---|---|---|---|---|---|---|---|---|---|---|---|---|---|---|---|---|---|---|---|---|
| Oligomannose | 100 | 0 | 98 | 78 | 0 | 0 | 0 | 0 | 63 | 4  | 0 | 0 | 0 | 94 | 0 | 0  | 0  | 0 | 0 | 0 | 0 | 0 | 0 | 0 | 0 | 0 | 0 | 0 | 0 | 0 | 0 | 0 | 0 | 0 | 0 | 0 | 0 |   |
| Hybrid       | 0   | 0 | 0  | 11 | 0 | 0 | 0 | 0 | 18 | 0  | 0 | 0 | 0 | 1  | 0 | 4  | 0  | 0 | 0 | 0 | 0 | 0 | 0 | 0 | 0 | 0 | 0 | 0 | 0 | 0 | 0 | 0 | 0 | 0 | 0 | 0 | 0 | 0 |
| Complex      | 0   | 0 | 2  | 10 | 0 | 0 | 0 | 0 | 19 | 96 | 0 | 0 | 0 | 0  | 0 | 81 | 0  | 0 | 0 | 0 | 0 | 0 | 0 | 0 | 0 | 0 | 0 | 0 | 0 | 0 | 0 | 0 | 0 | 0 | 0 | 0 | 0 | 0 |
| Unoccupied   | 0   | 0 | 1  | 1  | 0 | 0 | 0 | 0 | 0  | 1  | 0 | 0 | 0 | 0  | 0 | 0  | 0  | 0 | 0 | 0 | 0 | 0 | 0 | 0 | 0 | 0 | 0 | 0 | 0 | 0 | 0 | 0 | 0 | 0 | 0 | 0 | 0 | 0 |
| Fucose       | 0   | 0 | 0  | 2  | 0 | 0 | 0 | 0 | 7  | 95 | 0 | 0 | 0 | 0  | 0 | 0  | 71 | 0 | 0 | 0 | 0 | 0 | 0 | 0 | 0 | 0 | 0 | 0 | 0 | 0 | 0 | 0 | 0 | 0 | 0 | 0 | 0 | 0 |
| NeuAc        | 0   | 0 | 0  | 1  | 0 | 0 | 0 | 0 | 8  | 24 | 0 | 0 | 0 | 0  | 0 | 4  | 0  | 0 | 0 | 0 | 0 | 0 | 0 | 0 | 0 | 0 | 0 | 0 | 0 | 0 | 0 | 0 | 0 | 0 | 0 | 0 | 0 | 0 |

  

| RaTG13           | N17 | N20 | N28 | N30 | N59 | N61 | N69 | N74 | N112 | N122 | N149 | N162 | N165 | N176 | N185 | N234 | N282 | N307 | N331 | N343 | N370 | N554 | N603 | N616 | N657 | N677 | N709 | N717 | N801 | N1074 | N1098 | N1134 | N1158 | N1173 | N1194 |   |   |   |
|------------------|-----|-----|-----|-----|-----|-----|-----|-----|------|------|------|------|------|------|------|------|------|------|------|------|------|------|------|------|------|------|------|------|------|-------|-------|-------|-------|-------|-------|---|---|---|
| MBGlc            | 0   | 0   | 0   | 0   | 0   | 0   | 0   | 0   | 0    | 0    | 0    | 0    | 0    | 0    | 0    | 0    | 0    | 0    | 0    | 0    | 0    | 0    | 0    | 0    | 0    | 0    | 0    | 0    | 0    | 0     | 0     | 0     | 0     | 0     | 0     | 0 | 0 |   |
| M9               | 0   | 0   | 1   | 0   | 0   | 0   | 0   | 0   | 0    | 0    | 0    | 0    | 0    | 0    | 0    | 0    | 0    | 0    | 0    | 0    | 0    | 0    | 0    | 0    | 0    | 0    | 0    | 0    | 0    | 0     | 0     | 0     | 0     | 0     | 0     | 0 | 0 | 0 |
| M8               | 0   | 0   | 4   | 1   | 0   | 0   | 0   | 0   | 0    | 0    | 0    | 0    | 0    | 0    | 0    | 0    | 0    | 0    | 0    | 0    | 0    | 0    | 0    | 0    | 0    | 0    | 0    | 0    | 0    | 0     | 0     | 0     | 0     | 0     | 0     | 0 | 0 | 0 |
| M7               | 0   | 0   | 28  | 1   | 0   | 0   | 0   | 0   | 0    | 0    | 0    | 0    | 0    | 0    | 0    | 0    | 0    | 0    | 0    | 0    | 0    | 0    | 0    | 0    | 0    | 0    | 0    | 0    | 0    | 0     | 0     | 0     | 0     | 0     | 0     | 0 | 0 | 0 |
| M6               | 0   | 0   | 45  | 13  | 0   | 0   | 0   | 0   | 0    | 0    | 0    | 0    | 0    | 0    | 0    | 0    | 0    | 0    | 0    | 0    | 0    | 0    | 0    | 0    | 0    | 0    | 0    | 0    | 0    | 0     | 0     | 0     | 0     | 0     | 0     | 0 | 0 | 0 |
| M5               | 0   | 0   | 16  | 63  | 0   | 0   | 0   | 0   | 17   | 0    | 0    | 0    | 0    | 0    | 0    | 0    | 0    | 0    | 0    | 0    | 0    | 0    | 0    | 0    | 0    | 0    | 0    | 0    | 0    | 0     | 0     | 0     | 0     | 0     | 0     | 0 | 0 | 0 |
| M4               | 0   | 0   | 1   | 3   | 0   | 0   | 0   | 0   | 1    | 0    | 0    | 0    | 0    | 0    | 0    | 0    | 0    | 0    | 0    | 0    | 0    | 0    | 0    | 0    | 0    | 0    | 0    | 0    | 0    | 0     | 0     | 0     | 0     | 0     | 0     | 0 | 0 | 0 |
| M3               | 0   | 0   | 0   | 0   | 0   | 0   | 0   | 0   | 0    | 0    | 0    | 0    | 0    | 0    | 0    | 0    | 0    | 0    | 0    | 0    | 0    | 0    | 0    | 0    | 0    | 0    | 0    | 0    | 0    | 0     | 0     | 0     | 0     | 0     | 0     | 0 | 0 | 0 |
| FM               | 0   | 0   | 0   | 0   | 0   | 0   | 0   | 0   | 0    | 0    | 0    | 0    | 0    | 0    | 0    | 0    | 0    | 0    | 0    | 0    | 0    | 0    | 0    | 0    | 0    | 0    | 0    | 0    | 0    | 0     | 0     | 0     | 0     | 0     | 0     | 0 | 0 | 0 |
| Hybrid           | 0   | 0   | 0   | 0   | 0   | 0   | 0   | 0   | 0    | 0    | 0    | 0    | 0    | 0    | 0    | 0    | 0    | 0    | 0    | 0    | 0    | 0    | 0    | 0    | 0    | 0    | 0    | 0    | 0    | 0     | 0     | 0     | 0     | 0     | 0     | 0 | 0 | 0 |
| Fhybrid          | 0   | 0   | 0   | 0   | 0   | 0   | 0   | 0   | 0    | 0    | 0    | 0    | 0    | 0    | 0    | 0    | 0    | 0    | 0    | 0    | 0    | 0    | 0    | 0    | 0    | 0    | 0    | 0    | 0    | 0     | 0     | 0     | 0     | 0     | 0     | 0 | 0 | 0 |
| HexNAc(3)(x)     | 0   | 0   | 0   | 0   | 0   | 0   | 0   | 0   | 0    | 0    | 0    | 0    | 0    | 0    | 0    | 0    | 0    | 0    | 0    | 0    | 0    | 0    | 0    | 0    | 0    | 0    | 0    | 0    | 0    | 0     | 0     | 0     | 0     | 0     | 0     | 0 | 0 | 0 |
| HexNAc(3)(F)(x)  | 0   | 0   | 0   | 0   | 0   | 0   | 0   | 0   | 0    | 0    | 0    | 0    | 0    | 0    | 0    | 0    | 0    | 0    | 0    | 0    | 0    | 0    | 0    | 0    | 0    | 0    | 0    | 0    | 0    | 0     | 0     | 0     | 0     | 0     | 0     | 0 | 0 | 0 |
| HexNAc(4)(x)     | 0   | 0   | 0   | 0   | 0   | 0   | 0   | 0   | 0    | 0    | 0    | 0    | 0    | 0    | 0    | 0    | 0    | 0    | 0    | 0    | 0    | 0    | 0    | 0    | 0    | 0    | 0    | 0    | 0    | 0     | 0     | 0     | 0     | 0     | 0     | 0 | 0 | 0 |
| HexNAc(4)(F)(x)  | 0   | 0   | 0   | 0   | 0   | 0   | 0   | 0   | 0    | 0    | 0    | 0    | 0    | 0    | 0    | 0    | 0    | 0    | 0    | 0    | 0    | 0    | 0    | 0    | 0    | 0    | 0    | 0    | 0    | 0     | 0     | 0     | 0     | 0     | 0     | 0 | 0 | 0 |
| HexNAc(5)(x)     | 0   | 0   | 0   | 0   | 0   | 0   | 0   | 0   | 0    | 0    | 0    | 0    | 0    | 0    | 0    | 0    | 0    | 0    | 0    | 0    | 0    | 0    | 0    | 0    | 0    | 0    | 0    | 0    | 0    | 0     | 0     | 0     | 0     | 0     | 0     | 0 | 0 | 0 |
| HexNAc(5)(F)(x)  | 0   | 0   | 0   | 0   | 0   | 0   | 0   | 0   | 0    | 0    | 0    | 0    | 0    | 0    | 0    | 0    | 0    | 0    | 0    | 0    | 0    | 0    | 0    | 0    | 0    | 0    | 0    | 0    | 0    | 0     | 0     | 0     | 0     | 0     | 0     | 0 | 0 | 0 |
| HexNAc(6+)(x)    | 0   | 0   | 0   | 0   | 0   | 0   | 0   | 0   | 0    | 0    | 0    | 0    | 0    | 0    | 0    | 0    | 0    | 0    | 0    | 0    | 0    | 0    | 0    | 0    | 0    | 0    | 0    | 0    | 0    | 0     | 0     | 0     | 0     | 0     | 0     | 0 | 0 | 0 |
| HexNAc(6+)(F)(x) | 0   | 0   | 0   | 0   | 0   | 0   | 0   | 0   | 0    | 0    | 0    | 0    | 0    | 0    | 0    | 0    | 0    | 0    | 0    | 0    | 0    | 0    | 0    | 0    | 0    | 0    | 0    | 0    | 0    | 0     | 0     | 0     | 0     | 0     | 0     | 0 | 0 | 0 |
| Unoccupied       | 100 | 0   | 4   | 16  | 0   | 0   | 0   | 0   | 0    | 4    | 0    | 0    | 0    | 0    | 0    | 0    | 0    | 0    | 0    | 0    | 0    | 0    | 0    | 0    | 0    | 0    | 0    | 0    | 0    | 0     | 0     | 0     | 0     | 0     | 0     | 0 | 0 |   |
| Core             | 0   | 0   | 1   | 1   | 0   | 0   | 0   | 0   | 0    | 0    | 0    | 0    | 0    | 0    | 0    | 0    | 0    | 0    | 0    | 0    | 0    | 0    | 0    | 0    | 0    | 0    | 0    | 0    | 0    | 0     | 0     | 0     | 0     | 0     | 0     | 0 | 0 |   |

  

|              |   |   |    |    |   |   |   |   |    |   |   |
|--------------|---|---|----|----|---|---|---|---|----|---|---|
| Oligomannose | 0 | 0 | 95 | 81 | 0 | 0 | 0 | 0 | 19 | 0 | 0 |
|--------------|---|---|----|----|---|---|---|---|----|---|---|





| RS4081           | N17 | N20 | N28 | N30 | N59 | N61 | N69 | N74 | N112 | N122 | N149 | N162 | N165 | N176 | N185 | N234 | N282 | N307 | N331 | N343 | N370 | N554 | N603 | N616 | N657 | N677 | N709 | N717 | N801 | N1074 | N1088 | N1134 | N1156 | N1173 | N1194 |   |   |   |
|------------------|-----|-----|-----|-----|-----|-----|-----|-----|------|------|------|------|------|------|------|------|------|------|------|------|------|------|------|------|------|------|------|------|------|-------|-------|-------|-------|-------|-------|---|---|---|
| MBGlc            |     |     |     |     | 0   | 0   | 0   | 0   | 0    | 0    | 0    | 0    | 0    | 0    | 0    | 0    | 0    | 0    | 0    | 0    | 0    | 0    | 0    | 0    | 0    | 0    | 0    | 0    | 0    | 0     | 0     | 0     | 0     | 0     | 0     | 0 |   |   |
| M9               |     |     |     |     | 0   | 0   | 0   | 0   | 0    | 0    | 0    | 0    | 0    | 0    | 0    | 2    | 0    | 0    | 0    | 0    | 0    | 0    | 0    | 0    | 0    | 0    | 0    | 0    | 0    | 0     | 0     | 0     | 0     | 0     | 0     | 0 | 0 |   |
| M8               |     |     |     |     | 0   | 0   | 0   | 0   | 0    | 0    | 0    | 0    | 0    | 0    | 0    | 17   | 0    | 0    | 0    | 0    | 0    | 0    | 0    | 0    | 0    | 0    | 0    | 0    | 0    | 0     | 0     | 0     | 0     | 0     | 0     | 0 | 0 | 0 |
| M7               |     |     |     |     | 0   | 0   | 0   | 0   | 0    | 0    | 0    | 0    | 0    | 0    | 0    | 16   | 0    | 38   | 0    | 0    | 0    | 1    | 0    | 0    | 0    | 0    | 0    | 0    | 7    | 1     | 0     | 0     | 0     | 0     | 0     | 0 | 0 | 0 |
| M6               |     |     |     |     | 2   | 0   | 0   | 0   | 0    | 0    | 0    | 0    | 0    | 0    | 0    | 11   | 0    | 25   | 0    | 0    | 1    | 1    | 0    | 0    | 0    | 0    | 0    | 16   | 1    | 0     | 0     | 0     | 0     | 0     | 0     | 0 | 0 | 0 |
| M5               |     |     |     |     | 61  | 0   | 0   | 0   | 0    | 0    | 0    | 12   | 0    | 0    | 0    | 20   | 0    | 37   | 3    | 19   | 26   | 19   | 0    | 0    | 0    | 0    | 64   | 25   | 4    | 3     | 1     | 0     | 0     | 0     | 0     | 0 | 0 | 0 |
| M4               |     |     |     |     | 4   | 0   | 0   | 0   | 0    | 0    | 0    | 0    | 0    | 0    | 0    | 5    | 0    | 0    | 0    | 5    | 0    | 1    | 0    | 0    | 0    | 0    | 6    | 2    | 0    | 0     | 0     | 0     | 0     | 0     | 0     | 0 | 0 | 0 |
| M3               |     |     |     |     | 0   | 0   | 0   | 0   | 0    | 0    | 0    | 0    | 0    | 0    | 0    | 1    | 0    | 0    | 0    | 0    | 0    | 0    | 0    | 0    | 0    | 0    | 0    | 1    | 0    | 0     | 0     | 0     | 0     | 0     | 0     | 0 | 0 | 0 |
| FM               |     |     |     |     | 0   | 0   | 0   | 0   | 0    | 0    | 0    | 0    | 0    | 0    | 0    | 0    | 0    | 0    | 0    | 0    | 0    | 0    | 0    | 0    | 0    | 0    | 0    | 0    | 0    | 0     | 0     | 0     | 0     | 0     | 0     | 0 | 0 | 0 |
| Hybrid           |     |     |     |     | 5   | 0   | 0   | 0   | 0    | 0    | 0    | 0    | 0    | 0    | 0    | 2    | 0    | 0    | 0    | 1    | 1    | 0    | 0    | 0    | 0    | 0    | 2    | 6    | 1    | 1     | 0     | 0     | 0     | 0     | 0     | 0 | 0 | 0 |
| Fhybrid          |     |     |     |     | 1   | 0   | 0   | 0   | 0    | 0    | 0    | 0    | 0    | 0    | 0    | 0    | 0    | 0    | 0    | 3    | 0    | 1    | 0    | 0    | 0    | 0    | 0    | 0    | 2    | 1     | 0     | 0     | 0     | 0     | 0     | 0 | 0 | 0 |
| HexNAc(3)(x)     |     |     |     |     | 7   | 0   | 0   | 0   | 0    | 0    | 0    | 0    | 0    | 0    | 0    | 1    | 0    | 0    | 0    | 1    | 1    | 3    | 0    | 0    | 0    | 0    | 4    | 4    | 2    | 5     | 0     | 0     | 0     | 0     | 0     | 0 | 0 | 0 |
| HexNAc(3)(F)(x)  |     |     |     |     | 1   | 0   | 0   | 0   | 0    | 0    | 0    | 0    | 0    | 0    | 0    | 1    | 0    | 0    | 5    | 5    | 4    | 12   | 6    | 0    | 0    | 0    | 3    | 12   | 2    | 0     | 0     | 0     | 0     | 0     | 0     | 0 | 0 | 0 |
| HexNAc(4)(x)     |     |     |     |     | 10  | 0   | 0   | 0   | 0    | 0    | 0    | 0    | 0    | 0    | 0    | 0    | 0    | 0    | 0    | 1    | 0    | 0    | 1    | 0    | 0    | 0    | 4    | 2    | 24   | 0     | 0     | 0     | 0     | 0     | 0     | 0 | 0 | 0 |
| HexNAc(4)(F)(x)  |     |     |     |     | 3   | 0   | 0   | 0   | 0    | 0    | 0    | 0    | 0    | 0    | 0    | 1    | 41   | 0    | 56   | 46   | 60   | 63   | 70   | 56   | 0    | 0    | 39   | 51   | 44   | 20    | 0     | 0     | 0     | 0     | 0     | 0 | 0 | 0 |
| HexNAc(5)(x)     |     |     |     |     | 6   | 0   | 0   | 0   | 0    | 0    | 0    | 0    | 0    | 0    | 0    | 0    | 0    | 0    | 1    | 0    | 0    | 0    | 0    | 0    | 0    | 0    | 1    | 0    | 6    | 0     | 0     | 0     | 0     | 0     | 0     | 0 | 0 | 0 |
| HexNAc(5)(F)(x)  |     |     |     |     | 1   | 0   | 0   | 0   | 0    | 0    | 0    | 0    | 0    | 0    | 0    | 0    | 59   | 0    | 29   | 17   | 2    | 0    | 23   | 12   | 0    | 0    | 12   | 18   | 10   | 2     | 0     | 0     | 0     | 0     | 0     | 0 | 0 | 0 |
| HexNAc(6+)(x)    |     |     |     |     | 0   | 0   | 0   | 0   | 0    | 0    | 0    | 0    | 0    | 0    | 0    | 0    | 0    | 0    | 0    | 0    | 0    | 0    | 0    | 0    | 0    | 0    | 0    | 0    | 0    | 0     | 0     | 0     | 0     | 0     | 0     | 0 | 0 | 0 |
| HexNAc(6+)(F)(x) |     |     |     |     | 0   | 0   | 0   | 0   | 0    | 0    | 0    | 0    | 0    | 0    | 0    | 0    | 0    | 0    | 2    | 0    | 0    | 0    | 0    | 0    | 0    | 0    | 0    | 2    | 2    | 0     | 0     | 0     | 0     | 0     | 100   | 0 | 0 | 0 |
| Unoccupied       |     |     |     |     | 0   | 0   | 0   | 0   | 0    | 0    | 0    | 0    | 0    | 0    | 0    | 21   | 0    | 0    | 4    | 2    | 0    | 0    | 0    | 0    | 33   | 0    | 0    | 0    | 5    | 0     | 0     | 0     | 77    | 0     | 0     | 0 | 0 | 0 |
| Core             |     |     |     |     | 0   | 0   | 0   | 0   | 0    | 0    | 0    | 0    | 0    | 0    | 0    | 2    | 0    | 0    | 0    | 1    | 0    | 0    | 0    | 0    | 0    | 0    | 0    | 1    | 0    | 2     | 0     | 0     | 0     | 0     | 0     | 0 | 0 | 0 |

  

|              |  |  |  |  |    |  |   |   |  |  |    |  |  |  |    |     |     |    |    |    |  |    |    |    |  |    |    |    |    |    |    |     |   |   |   |   |   |   |   |   |
|--------------|--|--|--|--|----|--|---|---|--|--|----|--|--|--|----|-----|-----|----|----|----|--|----|----|----|--|----|----|----|----|----|----|-----|---|---|---|---|---|---|---|---|
| Oligomannose |  |  |  |  | 67 |  |   |   |  |  | 12 |  |  |  | 71 | 0   | 100 | 3  | 24 | 29 |  | 22 | 0  | 0  |  | 94 | 29 | 5  | 3  | 1  | 0  |     |   |   |   |   |   |   |   |   |
| Hybrid       |  |  |  |  | 6  |  | 0 | 0 |  |  | 1  |  |  |  | 2  | 0   | 0   | 0  | 1  | 4  |  | 0  | 1  | 0  |  | 0  | 2  | 6  | 4  | 2  | 0  | 0   | 0 | 0 | 0 | 0 | 0 | 0 | 0 |   |
| Complex      |  |  |  |  | 26 |  | 0 | 0 |  |  | 87 |  |  |  | 6  | 100 | 0   | 92 | 73 | 67 |  | 78 | 99 | 67 |  | 0  | 4  | 64 | 86 | 95 | 22 | 100 | 0 | 0 | 0 | 0 | 0 | 0 | 0 |   |
| Unoccupied   |  |  |  |  | 0  |  | 0 | 0 |  |  | 0  |  |  |  | 21 | 0   | 0   | 4  | 2  | 0  |  | 0  | 0  | 33 |  | 0  | 0  | 0  | 5  | 0  | 77 | 0   | 0 | 0 | 0 | 0 | 0 | 0 | 0 | 0 |
| Fucose       |  |  |  |  | 5  |  | 0 | 0 |  |  | 87 |  |  |  | 2  | 100 | 0   | 92 | 68 | 69 |  | 74 | 99 | 67 |  | 0  | 0  | 55 | 85 | 59 | 22 | 100 | 0 | 0 | 0 | 0 | 0 | 0 | 0 | 0 |
| NeuAc        |  |  |  |  | 3  |  | 0 | 0 |  |  | 7  |  |  |  | 0  | 6   | 0   | 22 | 1  | 19 |  | 0  | 5  | 16 |  | 0  | 2  | 22 | 13 | 64 | 2  | 60  | 0 | 0 | 0 | 0 | 0 | 0 | 0 |   |

**Supplemental Table 7: Site-specific glycan analysis of clade 3 sarbecoviruses (related to Figure 2 and 3)**

| BiKY72           | N17 | N20 | N28 | N30 | N69 | N61 | N69 | N74 | N112 | N149 | N162 | N165 | N176 | N185 | N234 | N282 | N307 | N331 | N343 | N370 | N554 | N603 | N616 | N657 | N677 | N709 | N717 | N801 | N1074 | N1098 | N1134 | N1158 | N1173 | N1194 |   |
|------------------|-----|-----|-----|-----|-----|-----|-----|-----|------|------|------|------|------|------|------|------|------|------|------|------|------|------|------|------|------|------|------|------|-------|-------|-------|-------|-------|-------|---|
| M9Glc            | 0   | 0   | 0   | 0   | 0   | 0   | 0   | 0   | 0    | 0    | 0    | 0    | 0    | 0    | 0    | 0    | 0    | 0    | 0    | 0    | 0    | 0    | 0    | 0    | 0    | 0    | 0    | 0    | 0     | 0     | 0     | 0     | 0     | 0     |   |
| M9               | 0   | 0   | 0   | 0   | 0   | 0   | 0   | 0   | 0    | 0    | 0    | 0    | 0    | 6    | 0    | 0    | 0    | 0    | 0    | 0    | 0    | 0    | 0    | 0    | 0    | 0    | 0    | 0    | 0     | 0     | 0     | 0     | 0     | 0     |   |
| M8               | 0   | 0   | 0   | 0   | 0   | 0   | 0   | 0   | 0    | 0    | 0    | 0    | 0    | 26   | 0    | 0    | 0    | 0    | 0    | 0    | 0    | 0    | 0    | 0    | 0    | 0    | 0    | 0    | 0     | 0     | 0     | 0     | 0     | 0     |   |
| M7               | 0   | 0   | 0   | 0   | 0   | 0   | 0   | 0   | 0    | 0    | 0    | 0    | 0    | 27   | 0    | 0    | 0    | 0    | 0    | 0    | 0    | 0    | 0    | 0    | 0    | 0    | 0    | 0    | 0     | 0     | 0     | 0     | 0     | 0     |   |
| M6               | 0   | 0   | 0   | 0   | 0   | 0   | 0   | 0   | 0    | 0    | 0    | 0    | 0    | 18   | 0    | 0    | 0    | 0    | 0    | 0    | 0    | 0    | 0    | 0    | 0    | 0    | 0    | 0    | 0     | 0     | 0     | 0     | 0     | 0     |   |
| M5               | 3   | 0   | 0   | 0   | 37  | 64  | 46  | 1   | 7    | 0    | 0    | 0    | 0    | 22   | 7    | 5    | 3    | 16   | 46   | 3    | 12   | 46   | 3    | 12   | 19   | 38   | 7    | 21   | 8     | 0     | 0     | 0     | 18    |       |   |
| M4               | 0   | 0   | 0   | 0   | 0   | 2   | 0   | 0   | 0    | 0    | 0    | 0    | 0    | 0    | 0    | 0    | 0    | 0    | 0    | 0    | 0    | 0    | 0    | 0    | 0    | 0    | 0    | 0    | 0     | 0     | 0     | 0     | 0     | 0     |   |
| M3               | 0   | 0   | 0   | 0   | 0   | 0   | 5   | 0   | 0    | 0    | 0    | 0    | 0    | 0    | 0    | 0    | 0    | 0    | 0    | 0    | 0    | 0    | 0    | 0    | 0    | 2    | 0    | 0    | 0     | 0     | 0     | 0     | 0     | 0     |   |
| FM               | 0   | 0   | 0   | 0   | 0   | 0   | 0   | 0   | 0    | 0    | 0    | 0    | 0    | 0    | 0    | 0    | 0    | 0    | 0    | 0    | 0    | 0    | 0    | 0    | 0    | 2    | 0    | 0    | 0     | 0     | 0     | 0     | 0     | 0     |   |
| Hybrid           | 0   | 1   | 0   | 0   | 0   | 0   | 1   | 0   | 0    | 0    | 0    | 0    | 0    | 0    | 0    | 0    | 0    | 0    | 0    | 0    | 0    | 0    | 0    | 0    | 9    | 2    | 0    | 0    | 0     | 0     | 0     | 0     | 0     | 0     |   |
| Fhybrid          | 0   | 0   | 0   | 0   | 0   | 0   | 0   | 0   | 0    | 0    | 0    | 0    | 0    | 0    | 0    | 0    | 0    | 0    | 0    | 0    | 0    | 0    | 0    | 0    | 4    | 1    | 0    | 0    | 0     | 0     | 0     | 0     | 0     | 0     |   |
| HexNAc(3)(x)     | 0   | 0   | 0   | 0   | 11  | 12  | 6   | 0   | 0    | 0    | 0    | 0    | 0    | 1    | 0    | 1    | 0    | 0    | 0    | 0    | 0    | 0    | 0    | 0    | 18   | 5    | 0    | 0    | 0     | 0     | 0     | 0     | 0     | 0     |   |
| HexNAc(3)(F)(x)  | 0   | 0   | 0   | 0   | 0   | 0   | 0   | 0   | 0    | 0    | 0    | 0    | 0    | 0    | 0    | 5    | 2    | 0    | 0    | 0    | 0    | 0    | 0    | 0    | 28   | 6    | 0    | 0    | 0     | 0     | 0     | 0     | 0     | 0     |   |
| HexNAc(4)(x)     | 0   | 0   | 0   | 0   | 33  | 11  | 21  | 0   | 0    | 0    | 0    | 0    | 0    | 0    | 0    | 0    | 0    | 0    | 0    | 0    | 0    | 0    | 0    | 0    | 0    | 1    | 0    | 3    | 0     | 0     | 0     | 0     | 0     | 0     |   |
| HexNAc(4)(F)(x)  | 27  | 0   | 0   | 0   | 6   | 12  | 1   | 3   | 52   | 0    | 0    | 0    | 0    | 0    | 0    | 51   | 62   | 84   | 54   | 31   | 29   | 54   | 31   | 29   | 7    | 25   | 37   | 9    | 7     | 0     | 0     | 0     | 0     | 0     |   |
| HexNAc(5)(x)     | 0   | 0   | 0   | 0   | 11  | 0   | 7   | 0   | 0    | 0    | 0    | 0    | 0    | 0    | 0    | 0    | 0    | 0    | 0    | 0    | 0    | 0    | 0    | 0    | 0    | 1    | 0    | 0    | 0     | 0     | 0     | 0     | 0     | 0     |   |
| HexNAc(5)(F)(x)  | 8   | 0   | 0   | 0   | 0   | 0   | 0   | 5   | 41   | 0    | 0    | 0    | 0    | 0    | 0    | 35   | 32   | 0    | 0    | 21   | 27   | 0    | 0    | 0    | 3    | 16   | 0    | 0    | 0     | 0     | 0     | 0     | 0     | 0     |   |
| HexNAc(6+)(x)    | 0   | 0   | 0   | 0   | 0   | 0   | 0   | 0   | 0    | 0    | 0    | 0    | 0    | 0    | 0    | 0    | 0    | 0    | 0    | 0    | 0    | 0    | 0    | 0    | 0    | 0    | 0    | 0    | 0     | 0     | 0     | 0     | 0     | 0     | 0 |
| HexNAc(6+)(F)(x) | 0   | 0   | 0   | 0   | 0   | 0   | 0   | 1   | 0    | 0    | 0    | 0    | 0    | 22   | 0    | 3    | 0    | 0    | 0    | 46   | 32   | 0    | 0    | 0    | 3    | 0    | 56   | 33   | 0     | 100   | 0     | 100   | 0     | 15    |   |
| Unoccupied       | 59  | 1   | 0   | 0   | 12  | 89  | 0   | 0   | 0    | 0    | 0    | 0    | 0    | 70   | 0    | 0    | 0    | 0    | 0    | 0    | 0    | 0    | 0    | 0    | 0    | 0    | 0    | 32   | 86    | 0     | 0     | 0     | 67    |       |   |
| Core             | 4   | 0   | 0   | 0   | 0   | 0   | 0   | 0   | 0    | 0    | 0    | 0    | 0    | 0    | 0    | 0    | 0    | 0    | 0    | 0    | 0    | 0    | 0    | 0    | 1    | 3    | 0    | 0    | 0     | 0     | 0     | 0     | 0     | 0     |   |

  

|              |    |   |   |   |    |    |    |    |    |   |   |    |   |    |    |    |    |    |    |    |    |    |    |    |    |    |    |    |    |     |   |    |    |   |
|--------------|----|---|---|---|----|----|----|----|----|---|---|----|---|----|----|----|----|----|----|----|----|----|----|----|----|----|----|----|----|-----|---|----|----|---|
| Oligomannose | 3  | 0 | 0 | 0 | 37 | 66 | 46 | 1  | 7  | 0 | 0 | 0  | 0 | 99 | 7  | 5  | 4  | 16 | 46 | 3  | 12 | 46 | 3  | 12 | 24 | 39 | 7  | 23 | 8  | 0   | 0 | 0  | 18 |   |
| Hybrid       | 0  | 1 | 0 | 0 | 1  | 0  | 1  | 0  | 0  | 0 | 0 | 0  | 0 | 0  | 0  | 0  | 0  | 0  | 0  | 0  | 0  | 0  | 0  | 0  | 13 | 4  | 0  | 0  | 0  | 0   | 0 | 0  | 0  | 0 |
| Complex      | 38 | 0 | 0 | 0 | 61 | 34 | 40 | 10 | 93 | 0 | 1 | 22 | 0 | 2  | 22 | 95 | 96 | 84 | 54 | 97 | 88 | 54 | 97 | 88 | 62 | 57 | 93 | 44 | 7  | 100 | 0 | 15 |    |   |
| Unoccupied   | 59 | 1 | 0 | 0 | 12 | 89 | 0  | 0  | 0  | 0 | 0 | 0  | 0 | 70 | 0  | 0  | 0  | 0  | 0  | 0  | 0  | 0  | 0  | 0  | 0  | 0  | 0  | 32 | 86 | 0   | 0 | 0  | 67 |   |
| Fucose       | 35 | 0 | 0 | 0 | 6  | 12 | 1  | 10 | 93 | 0 | 0 | 22 | 0 | 22 | 0  | 94 | 96 | 84 | 54 | 97 | 88 | 54 | 97 | 88 | 47 | 48 | 93 | 41 | 7  | 100 | 0 | 15 |    |   |
| NeuAc        | 20 | 0 | 0 | 0 | 13 | 0  | 10 | 1  | 36 | 0 | 0 | 0  | 0 | 0  | 26 | 12 | 27 | 0  | 0  | 2  | 4  | 0  | 0  | 0  | 7  | 7  | 27 | 24 | 0  | 42  | 0 | 0  | 0  |   |

  

| BM4831           | N17 | N20 | N28 | N30 | N69 | N61 | N69 | N74 | N112 | N149 | N162 | N165 | N176 | N185 | N234 | N282 | N307 | N331 | N343 | N370 | N554 | N603 | N616 | N657 | N677 | N709 | N717 | N801 | N1074 | N1098 | N1134 | N1158 | N1173 | N1194 |   |
|------------------|-----|-----|-----|-----|-----|-----|-----|-----|------|------|------|------|------|------|------|------|------|------|------|------|------|------|------|------|------|------|------|------|-------|-------|-------|-------|-------|-------|---|
| M9Glc            | 0   | 0   | 0   | 0   | 0   | 0   | 0   | 0   | 0    | 0    | 0    | 0    | 0    | 0    | 0    | 0    | 0    | 0    | 0    | 0    | 0    | 0    | 0    | 0    | 0    | 0    | 0    | 0    | 0     | 0     | 0     | 0     | 0     | 0     | 0 |
| M9               | 0   | 0   | 0   | 0   | 0   | 0   | 0   | 0   | 0    | 0    | 0    | 0    | 0    | 16   | 0    | 0    | 0    | 0    | 0    | 0    | 0    | 0    | 0    | 0    | 0    | 0    | 0    | 0    | 0     | 0     | 0     | 0     | 0     | 0     | 0 |
| M8               | 0   | 0   | 0   | 0   | 6   | 0   | 0   | 0   | 0    | 0    | 0    | 0    | 0    | 32   | 0    | 0    | 0    | 0    | 0    | 0    | 0    | 0    | 0    | 0    | 0    | 0    | 0    | 0    | 0     | 0     | 0     | 0     | 0     | 0     | 0 |
| M7               | 0   | 0   | 0   | 0   | 13  | 0   | 0   | 0   | 0    | 0    | 0    | 0    | 0    | 17   | 0    | 0    | 0    | 0    | 0    | 0    | 0    | 0    | 0    | 0    | 0    | 1    | 0    | 0    | 0     | 0     | 0     | 0     | 0     | 0     | 0 |
| M6               | 0   | 0   | 0   | 0   | 35  | 0   | 0   | 0   | 0    | 0    | 0    | 0    | 0    | 8    | 0    | 0    | 0    | 0    | 0    | 0    | 0    | 0    | 0    | 0    | 0    | 0    | 0    | 0    | 0     | 0     | 0     | 0     | 0     | 0     | 0 |
| M5               | 0   | 0   | 0   | 0   | 40  | 2   | 39  | 0   | 18   | 10   | 0    | 0    | 0    | 8    | 0    | 26   | 0    | 0    | 14   | 0    | 0    | 0    | 0    | 0    | 0    | 3    | 21   | 8    | 0     | 1     | 1     | 3     | 0     | 0     |   |
| M4               | 0   | 0   | 0   | 0   | 0   | 0   | 7   | 0   | 0    | 0    | 0    | 0    | 0    | 3    | 0    | 2    | 0    | 0    | 0    | 0    | 0    | 0    | 0    | 0    | 0    | 2    | 0    | 0    | 0     | 0     | 0     | 0     | 0     | 0     | 0 |
| M3               | 0   | 0   | 0   | 0   | 0   | 0   | 6   | 0   | 0    | 0    | 0    | 0    | 0    | 1    | 0    | 0    | 0    | 0    | 0    | 0    | 0    | 0    | 0    | 0    | 0    | 0    | 0    | 0    | 0     | 0     | 0     | 0     | 0     | 0     | 0 |
| FM               | 0   | 0   | 0   | 0   | 0   | 0   | 0   | 0   | 0    | 0    | 0    | 0    | 0    | 0    | 0    | 2    | 0    | 0    | 0    | 0    | 0    | 0    | 0    | 0    | 0    | 0    | 0    | 0    | 0     | 0     | 0     | 0     | 0     | 0     | 0 |
| Hybrid           | 0   | 0   | 0   | 0   | 0   | 0   | 4   | 0   | 0    | 0    | 0    | 0    | 0    | 0    | 0    | 0    | 0    | 5    | 0    | 0    | 0    | 0    | 0    | 0    | 1    | 0    | 0    | 0    | 0     | 0     | 0     | 0     | 0     | 0     | 0 |
| Fhybrid          | 0   | 0   | 0   | 0   | 0   | 0   | 1   | 2   | 0    | 0    | 0    | 0    | 0    | 2    | 0    | 0    | 0    | 5    | 0    | 0    | 0    | 0    | 0    | 0    | 0    | 1    | 0    | 0    | 0     | 0     | 0     | 0     | 0     | 0     | 0 |
| HexNAc(3)(x)     | 0   | 0   | 0   | 0   | 0   | 0   | 0   | 4   | 1    | 0    | 0    | 0    | 0    | 12   | 0    | 0    | 15   | 0    | 0    | 0    | 0    | 0    | 0    | 0    | 19   | 0    | 0    | 2    | 0     | 0     | 0     | 0     | 0     | 0     | 0 |
| HexNAc(3)(F)(x)  | 0   | 0   | 0   | 0   | 0   | 3   | 2   | 13  | 9    | 0    | 0    | 0    | 0    | 21   | 0    | 0    | 26   | 8    | 11   | 0    | 0    | 0    | 0    | 4    | 35   | 3    | 0    | 0    | 0     | 0     | 0     | 0     | 0     | 0     | 0 |
| HexNAc(4)(x)     | 0   | 0   | 0   | 0   | 0   | 0   | 4   | 1   | 0    | 0    | 0    | 0    | 0    | 0    | 0    | 10   | 0    | 0    | 0    | 0    | 0    | 0    | 0    | 0    | 0    | 0    | 0    | 3    | 0     | 5     | 0     | 0     | 0     | 0     | 0 |
| HexNAc(4)(F)(x)  | 0   | 0   | 0   | 0   | 0   | 57  | 6   | 53  | 44   | 0    | 35   | 29   | 23   | 84   | 19   | 41   | 72   | 0    | 9    | 15   | 8    | 64   | 8    | 60   | 47   | 6    | 0    | 0    | 0     | 0     | 0     | 0     | 0     | 0     | 0 |
| HexNAc(5)(x)     | 0   | 0   | 0   | 0   | 0   | 0   | 1   | 0   | 0    | 0    | 0    | 0    | 0    | 0    | 0    | 0    | 0    | 0    | 0    | 0    | 0    | 0    | 0    | 0    | 0    | 0    | 0    | 1    | 5     | 0     | 0     | 0     | 0     | 0     | 0 |
| HexNAc(5)(F)(x)  | 0   | 0   | 0   | 0   | 0   | 22  | 3   | 7   | 26   | 0    | 54   | 7    | 76   | 16   | 4    | 28   | 17   | 0    | 58   | 40   | 9    | 10   | 66   | 24   | 28   | 21   | 0    | 0    | 0     | 0     | 0     | 0     | 0     | 0     | 0 |
| HexNAc(6+)(x)    | 0   | 0   | 0   | 0   | 0   | 0   | 0   | 0   | 0    | 0    | 0    | 0    | 0    | 0    | 0    | 0    | 0    | 0    | 0    | 0    | 0    | 0    | 0    | 0    | 0    | 0    | 0    | 0    | 0     | 0     | 0     | 0     | 0     | 0     | 0 |
| HexNAc(6+)(F)(x) | 0   | 0   | 0   | 0   | 0   | 0   | 0   | 0   | 1    | 0    | 0    | 0    | 0    | 0    | 0    | 0    | 0    | 13   | 0    | 0    | 0    | 0    | 0    | 32   | 10   | 0    | 26   | 1    | 16    | 21    | 0     | 39    | 0     | 61    |   |
| Unoccupied       | 0   | 0   | 0   | 0   | 7   | 15  | 27  | 2   | 8    | 12   | 11   | 0    | 0    | 12   | 11   | 0    | 0    | 0    | 9    | 0    | 0    | 0    | 2    | 29   | 0    | 8    | 0    | 3    | 3     | 50    | 0     | 61    | 0     | 61    |   |
| Core             | 0   | 0   | 0   | 0   | 0   | 0   | 2   | 0   | 0    | 0    | 0    | 0    | 0    | 2    | 0    | 0    | 1    | 0    | 1    | 0    | 0    | 0    | 0    | 0    | 0    | 1    | 4    | 0    | 0     | 0     | 0     | 0     | 0     | 0     | 0 |

  

|              |   |   |   |   |    |    |    |    |    |    |    |     |     |    |    |     |   |    |    |    |     |     |    |    |    |   |    |   |   |   |   |   |   |   |   |    |
|--------------|---|---|---|---|----|----|----|----|----|----|----|-----|-----|----|----|-----|---|----|----|----|-----|-----|----|----|----|---|----|---|---|---|---|---|---|---|---|----|
| Oligomannose | 0 | 0 | 0 | 0 | 93 | 2  | 46 | 18 | 10 | 84 | 0  | 30  | 0   | 0  | 14 | 0   | 0 | 0  | 0  | 0  | 0   | 0   | 0  | 0  | 0  | 3 | 25 | 8 | 0 | 1 | 1 | 3 | 0 | 0 |   |    |
| Hybrid       | 0 | 0 | 0 | 0 | 5  | 2  | 0  | 2  | 0  | 0  | 0  | 2   | 0   | 0  | 11 | 0   | 0 | 0  | 0  | 0  | 0   | 0   | 0  | 0  | 0  | 0 | 3  | 0 | 0 | 0 | 0 | 0 | 0 | 0 | 0 |    |
| Complex      | 0 | 0 | 0 | 0 | 83 | 22 | 78 | 82 | 3  | 89 | 68 | 100 | 100 | 75 | 90 | 100 | 0 | 98 | 69 | 72 | 84  | 100 | 96 | 96 | 48 | 0 | 0  | 0 | 0 | 0 | 0 | 0 | 0 | 0 | 0 | 39 |
| Unoccupied   | 0 | 0 | 0 | 0 | 7  | 15 | 27 | 2  | 8  | 12 | 11 | 0   | 0   | 0  | 0  | 9   | 0 | 0  | 2  | 29 | 0</ |     |    |    |    |   |    |   |   |   |   |   |   |   |   |    |
